# Supplementary material for: Biases in detection of apparent “weekend effect” on outcome with administrative coding data: population based study of stroke
Source: PubMed Central journal article supplement (PMC4868367; doi:10.1136/bmj.i2648), 2016-05-16
Supplement: lili033127.ww1_default.pdf [file lili033127.ww1_default.pdf]

**Appendix 1: Supplementary tables** [posted as supplied by author]

**Table A Differences in inaccurate coding reasons in admissions during weekdays vs. weekend restricted to episodes coded as I60 to I64**

|                                                             | <b>Weekdays<br/>(%)</b> | <b>Weekend<br/>(%)</b> | <b>P</b> | <b>Total<br/>(%)</b> |
|-------------------------------------------------------------|-------------------------|------------------------|----------|----------------------|
| <b>Correctly identified episodes by coding</b>              | (n=750)                 | (n=278)                | 0.44     | (n=1028)             |
| Incident stroke                                             | 557(74.3)               | 213 (76.6)             |          | 770 (74.9)           |
| Recurrent stroke                                            | 193 (15.7)              | 65 (23.4)              |          | 258 (25.1)           |
| <b>Incorrectly identified episodes by coding</b>            | (n=317)                 | (n=77)                 | 0.02     | (n=394)              |
| Cancelled admission                                         | 2 (0.6)                 | 0 (0)                  | 0.49     | 2 (0.5)              |
| Investigation or procedure only†                            | 24 (7.6)                | 1 (1.3)                | 0.04     | 25 (6.3)             |
| Other diagnosis‡                                            | 79 (24.9)               | 20 (26.0)              | 0.85     | 99 (25.1)            |
| Rehabilitation after stroke                                 | 55 (17.4)               | 8 (10.4)               | 0.14     | 63 (16.0)            |
| Medical problem post stroke discharge                       | 19 (6.0)                | 4 (5.2)                | 0.79     | 23 (5.8)             |
| Subdural/extradural haemorrhage                             | 47 (14.8)               | 8 (10.4)               | 0.31     | 55 (14.0)            |
| Transferred from other hospital                             | 27 (8.5)                | 5 (6.5)                | 0.56     | 32 (8.1)             |
| Admission date wrong                                        | 40 (12.6)               | 24 (31.2)              | <0.0001  | 64 (16.2)            |
| Inpatient event after elective admission                    | 4 (1.3)                 | 1 (1.3)                |          |                      |
| Inpatient event after emergency admission for other disease | 22 (6.9)                | 15 (19.5)              |          |                      |
| Admission date wrong                                        | 14 (4.4)                | 8 (10.4)               |          |                      |
| General practitioner information wrong                      | 15 (4.7)                | 4 (5.2)                | 0.87     | 19 (4.8)             |
| Unknown                                                     | 9 (2.8)                 | 3 (3.9)                | 0.63     | 12 (3.0)             |

† including carotid endarterectomy, cerebral angiography, endovascular treatment for aneurysm, neurosurgery, brain imaging

‡ including transient ischaemic attack, amaurosis fugax, trauma only, dementia, brain tumour, small vessel disease, vasculitis, seizure, headache

**Table B. Differences in inaccurate coding reasons in admissions during weekdays vs. weekend restricted to episodes coded as I60, I61, I62.9, I63 and I64**

|                                                             | Weekdays (%) | Weekend (%) | p     | Total (%)  |
|-------------------------------------------------------------|--------------|-------------|-------|------------|
| <b>Correctly identified episodes by coding</b>              | (n=748)      | (n=277)     | 0.47  | (n=1025)   |
| Incident stroke                                             | 556 (74.3)   | 212 (76.5)  |       | 768 (74.9) |
| Recurrent stroke                                            | 192 (25.7)   | 65 (23.5)   |       | 257 (25.1) |
| <b>Incorrectly identified episodes by coding</b>            | (n=266)      | (n=69)      | 0.08  | (n=335)    |
| Cancelled admission                                         | 2 (0.8)      | 0 (0)       | 0.47  | 2 (0.6)    |
| Investigation or procedure only†                            | 21 (7.9)     | 1 (1.4)     | 0.05  | 22 (6.6)   |
| Other diagnosis‡                                            | 75 (78.2)    | 20 (29.0)   | 0.9   | 95 (28.4)  |
| Rehabilitation after stroke                                 | 55 (20.7)    | 8 (11.6)    | 0.09  | 63 (18.8)  |
| Medical problem post stroke discharge                       | 19 (7.1)     | 4 (5.8)     | 0.69  | 23 (6.9)   |
| Subdural/extradural haemorrhage                             | 3 (1.1)      | 1 (1.4)     | 0.83  | 4 (1.2)    |
| Transferred from other hospital                             | 27 (10.2)    | 5 (7.2)     | 0.47  | 32 (9.6)   |
| Admission date wrong                                        | 40 (15.0)    | 23 (33.3)   | 0.001 | 63 (18.8)  |
| Inpatient event after elective admission                    | 4 (1.5)      | 1 (1.4)     |       |            |
| Inpatient event after emergency admission for other disease | 22 (8.3)     | 15 (21.7)   |       |            |
| Admission date wrong                                        | 14 (5.3)     | 7 (10.1)    |       |            |
| General practitioner information wrong                      | 15 (5.6)     | 4 (5.8)     | 0.96  | 19 (5.7)   |
| Unknown                                                     | 9 (3.4)      | 3 (4.3)     | 0.7   | 12 (3.6)   |

† including carotid endarterectomy, cerebral angiography, endovascular treatment for aneurysm, neurosurgery, brain imaging

‡ including transient ischaemic attack, amaurosis fugax, trauma only, dementia, brain tumour, small vessel disease, vasculitis, seizure, headache

**Table C. Differences in 30-day case-fatality, frequency and reasons for inaccurate coding of stroke admissions during weekdays vs. weekend only including emergency cases (defined by admission method) by coding**

|                                                    | Total       | Outcome:<br>Death at 30d (%) | Admissions:       |                   | p            |
|----------------------------------------------------|-------------|------------------------------|-------------------|-------------------|--------------|
|                                                    |             |                              | Weekdays (%)      | Weekend (%)       |              |
| Total                                              | (n=1327)    |                              | (n=976)           | (n=351)           |              |
| <b>Correctly identified episodes by coding</b>     | <b>1042</b> | <b>231 (22.2)†</b>           | <b>761 (78.0)</b> | <b>281 (80.1)</b> | <b>0.41</b>  |
| <b>Cases of low expected case-fatality</b>         | <b>238</b>  | <b>35 (14.7)</b>             | <b>190 (19.5)</b> | <b>48 (13.7)</b>  | <b>0.015</b> |
| Elective admissions miscoded as emergency          | 40          | 7 (17.5)                     | 33 (3.4)          | 7 (2.0)           | 0.19         |
| Non-stroke diagnoses                               | 198         | 28 (14.1)                    | 157 (16.1)        | 41 (11.7)         | 0.047        |
| Medical problem post stroke discharge              | 12          | 6 (50.0)                     | 10 (1.0)          | 2 (0.6)           |              |
| Subdural/extradural haemorrhage                    | 48          | 10 (20.8)                    | 40 (4.1)          | 8 (2.3)           |              |
| Other diagnosis‡                                   | 138         | 12 (8.7)                     | 107 (11.0)        | 31 (9.0)          |              |
| <b>Admission date wrong</b>                        | <b>47</b>   | <b>18 (38.3)</b>             | <b>25 (2.6)</b>   | <b>22 (6.3)</b>   | <b>0.001</b> |
| Inpatient event during admission for other disease | 37          | 17 (45.9)                    | 22 (2.3)          | 15 (4.4)          |              |
| Admission date wrong                               | 10          | 1 (10.0)                     | 3 (0.3)           | 7 (2.0)           |              |

† p for difference between the correctly identified episodes vs. cases of low expected case-fatality: p=0.01

‡ including transient ischaemic attack, amaurosis fugax, trauma only, dementia, brain tumour, small vessel disease, vasculitis, seizure, headache

**Table D. Accuracy of “admission method” in coding data for acute aortic events in OXVASC**

| Coding recorded | OXVASC adjudicated (% of total) |           |       |           |           |       |           |           |       |
|-----------------|---------------------------------|-----------|-------|-----------|-----------|-------|-----------|-----------|-------|
|                 | Overall                         |           |       | Weekday   |           |       | Weekend   |           |       |
|                 | Elective                        | Emergency | Total | Elective  | Emergency | Total | Elective  | Emergency | Total |
| Elective        | 76 (48.4)                       | 4 (2.5)   | 80    | 66 (52.4) | 4 (3.2)   | 70    | 10 (32.3) | 0 (0)     | 10    |
| Emergency       | 9 (5.7)                         | 68 (43.3) | 77    | 8 (6.3)   | 48 (38.0) | 56    | 1 (3.2)   | 20 (64.5) | 21    |
| Total           | 85 (54.1)                       | 72 (45.9) | 157   | 74 (58.7) | 52 (41.3) | 126   | 11 (35.5) | 20 (64.5) | 31    |

**Table E Frequency and reasons of inaccurate coding of stroke admissions during weekdays vs. weekend stratified by OXVASC study period (30 month period)**

|                                                                   | Overall         |                | 2002-2004      |               | 2004-2007      |               | 2007-2009      |               | 2009-2012      |               | 2012-2014      |               |
|-------------------------------------------------------------------|-----------------|----------------|----------------|---------------|----------------|---------------|----------------|---------------|----------------|---------------|----------------|---------------|
|                                                                   | Weekday†        | Weekend        | Weekday        | Weekend       | Weekday        | Weekend       | Weekday        | Weekend       | Weekday        | Weekend       | Weekday        | Weekend       |
| <b>Total</b>                                                      | <b>(n=1308)</b> | <b>(n=385)</b> | <b>(n=276)</b> | <b>(n=66)</b> | <b>(n=251)</b> | <b>(n=76)</b> | <b>(n=245)</b> | <b>(n=72)</b> | <b>(n=271)</b> | <b>(n=86)</b> | <b>(n=265)</b> | <b>(n=85)</b> |
| <b>Correctly identified episodes by coding (true positive)‡</b>   |                 |                |                |               |                |               |                |               |                |               |                |               |
|                                                                   | 772 (59.0)      | 283 (73.5)     | 147 (53.3)     | 43 (65.2)     | 142 (56.6)     | 52 (68.4)     | 151 (61.6)     | 59 (81.9)     | 158 (58.3)     | 64 (74.4)     | 174 (65.7)     | 65 (76.5)     |
| <b>Incorrectly identified episodes by coding (false positive)</b> |                 |                |                |               |                |               |                |               |                |               |                |               |
|                                                                   | (n=536)         | (n=102)        | (n=129)        | (n=23)        | (n=109)        | (n=24)        | (n=94)         | (n=13)        | (n=113)        | (n=22)        | (n=91)         | (n=20)        |
| Cancelled admission                                               | 15 (2.8)        | 0 (0)          | 0 (0)          | 0 (0)         | 0 (0)          | 0 (0)         | 3 (3.2)        | 0 (0)         | 9 (8.0)        | 0 (0)         | 3 (3.3)        | 0 (0)         |
| Elective admission                                                | 267 (49.8)      | 26 (25.5)      | 60 (46.5)      | 7 (30.4)      | 49 (45.0)      | 6 (25.0)      | 51 (54.3)      | 3 (23.1)      | 60 (53.1)      | 6 (27.3)      | 47 (51.6)      | 4 (20.0)      |
| Non-stroke diagnosis                                              | 183 (34.1)      | 43 (42.2)      | 41 (31.8)      | 7 (30.4)      | 46 (42.2)      | 14 (58.3)     | 30 (31.9)      | 7 (53.8)      | 32 (28.3)      | 5 (22.7)      | 34 (37.4)      | 10 (50.0)     |
| Admission date wrong                                              | 46 (8.6)        | 26 (25.5)      | 16 (12.4)      | 6 (26.1)      | 9 (8.3)        | 3 (12.5)      | 8 (8.5)        | 2 (15.4)      | 9 (8.0)        | 9 (40.9)      | 4 (4.4)        | 6 (30.0)      |
| GP wrong                                                          | 16 (3.0)        | 4 (3.9)        | 5 (3.9)        | 0 (0)         | 3 (2.8)        | 1 (4.2)       | 2 (2.1)        | 1 (7.7)       | 3 (2.7)        | 2 (9.1)       | 3 (3.3)        | 0 (0)         |
| Unknown                                                           | 9 (1.7)         | 3 (2.9)        | 7 (5.4)        | 3 (13.0)      | 2 (1.8)        | 0 (0)         | 0 (0)          | 0 (0)         | 0 (0)          | 0 (0)         | 0 (0)          | 0 (0)         |

All numbers indicates number (%) unless otherwise stated.

†There is a trend of improved coding accuracy over the time both for weekday and weekend admissions (weekday -  $p_{\text{trend}}=0.005$ ; weekend -  $p_{\text{trend}}=0.09$ ).

‡The more false negative cases at weekday vs. weekend admissions did not change over time ( $p_{\text{trend}}=0.74$ ).

**Table F. Case-fatality at 30 days in weekend vs. weekday admissions for all incident strokes that were admitted to the hospital in OXVASC stratified by study periods**

| Study Period | Weekend<br>(Death/Total) | Weekday<br>(Death/Total) | OR<br>(95%CI)    | P*   | Adjusted OR†<br>(95%CI) | p    |
|--------------|--------------------------|--------------------------|------------------|------|-------------------------|------|
| 2002-2006    | 21/96 (21.9)             | 69/261 (26.4)            | 0.78 (0.45-1.36) | 0.38 | 0.79 (0.42-1.48)        | 0.47 |
| 2006-2010    | 21/111 (18.9)            | 69/290 (23.8)            | 0.75 (0.43-1.29) | 0.30 | 0.64 (0.35-1.17)        | 0.15 |
| 2010-2014    | 22/121 (18.2)            | 57/288 (19.8)            | 0.90 (0.52-1.55) | 0.71 | 0.90 (0.48-1.67)        | 0.73 |

\*There was also no significant interaction between the study period and 'weekend effect'- p=0.71.

† adjusted for age, sex, stroke severity and baseline disability
