# Supplementary material for: Biases in detection of apparent “weekend effect” on outcome with administrative coding data: population based study of stroke
Source: PubMed Central journal article supplement (PMC4868367; doi:10.1136/bmj.i2648), 2016-05-16

Appendix 2: Supplementary figures [posted as supplied by author]

Fig A. Modified rankin scale (mRS) at 30 days in patients admitted during weekend vs. weekdays in OXVASC excluding death at emergency department and inpatient events

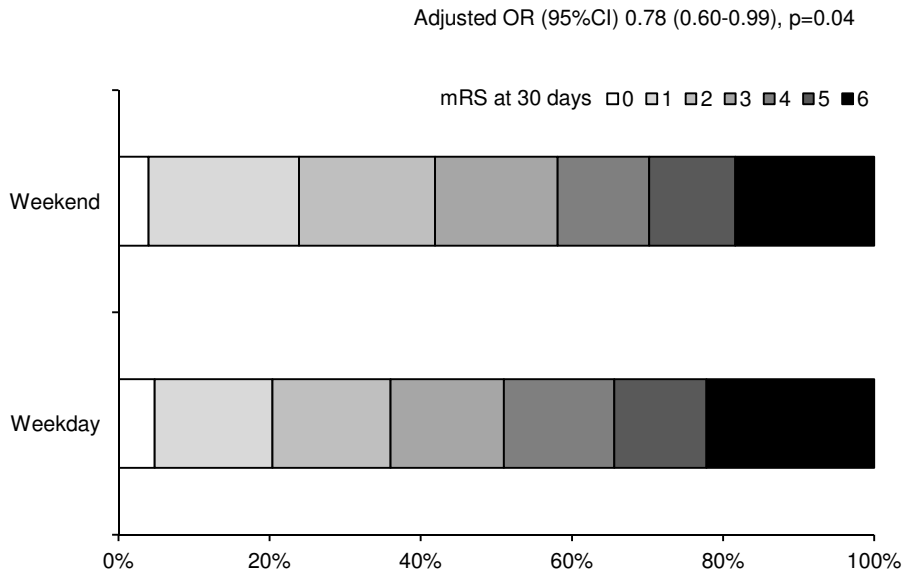

Fig B. Stroke severity (NIHSS scale) distribution of patients admitted during weekend vs. weekdays in OXVASC excluding death at emergency department and inpatient events

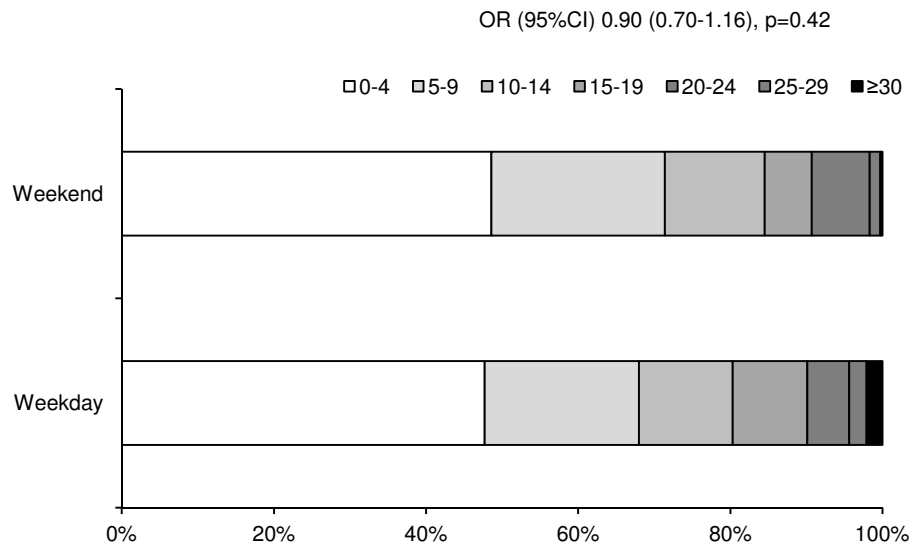

Supplement: lili033127.ww2_default.pdf [file lili033127.ww2_default.pdf]
