# Supplementary material for: Biases in detection of apparent “weekend effect” on outcome with administrative coding data: population based study of stroke
Source: PubMed Central journal article supplement (PMC4868367; doi:10.1136/bmj.i2648), 2016-05-16
Supplement: lili033127.ww3_default.pdf [file lili033127.ww3_default.pdf]

**Appendix 3: Details of previous studies that studied if there is any ‘weekend effect’ in stroke patients [posted as supplied by author]**

| Year | Study period             | Country | Data source                                         | Stroke subtype | ICD codes used                                                                     | Potentially inaccurate codes                                                                      | If admission method available                                                                           | Double-counting            | Severity included                           | Comorbidity included        | Outcome measure | ‘Weekend effect’ |
|------|--------------------------|---------|-----------------------------------------------------|----------------|------------------------------------------------------------------------------------|---------------------------------------------------------------------------------------------------|---------------------------------------------------------------------------------------------------------|----------------------------|---------------------------------------------|-----------------------------|-----------------|------------------|
| 2001 | 1988-1997 <sup>e1</sup>  | Canada  | Administrative database                             | ICH            | 431                                                                                | 432.9/unspecified intracranial bleed not included                                                 | Elective admissions, urgent referrals and elective transfers excluded                                   | NR                         | NR                                          | CCI                         | Death           | No               |
| 2004 | 1998 <sup>e2</sup>       | US      | Administrative database                             | Stroke         | 430, 431, 432, 434, 436                                                            | 433 not included; 432 included SDH/EDH, 436 included seizure                                      | Separate analyses for all admissions, all unscheduled admissions and all unscheduled admissions from ED | NR                         | NR                                          | CCI                         | Death           | No               |
| 2005 | 2000-2001 <sup>e3</sup>  | Japan   | Prospective registry                                | IS/ICH         | NR                                                                                 | -                                                                                                 | -                                                                                                       | NR                         | NIHSS                                       | RF and premorbid disability | Death and mRS   | Yes              |
| 2007 | 2003-2004 <sup>e4</sup>  | Canada  | Administrative database                             | IS             | 163, 164 OR 433.01, 433.11, 433.21, 433.31, 433.81, 433.91, 434.01, 434.11, 434.91 | No                                                                                                | Not reported                                                                                            | NR                         | NR                                          | CCI                         | Death           | Yes              |
| 2007 | 1968-2005 <sup>e5</sup>  | Sweden  | Administrative database                             | IS             | NR                                                                                 | -                                                                                                 | Not reported                                                                                            | Only first ischemic stroke | NR                                          | NR                          | Death           | Yes              |
| 2008 | 1988-2003 <sup>e6</sup>  | Japan   | Prospective registry                                | Stroke         | NR                                                                                 | -                                                                                                 | -                                                                                                       | Only first-ever stroke     | NR                                          | NR                          | Death           | Yes              |
| 2009 | 2003-2006 <sup>e7</sup>  | Germany | Prospective registry                                | IS             | 163                                                                                | 164 not included                                                                                  | -                                                                                                       | NR                         | Motor deficit, consciousness/ cardioembolic | RF and premorbid mRS        | Death and mRS   | No               |
| 2009 | 2005 <sup>e8</sup>       | Taiwan  | Administrative database                             | IS             | 433.01, 433.11, 433.21, 433.31, 433.81, 433.91, 434.01, 434.11, 434.91             | No                                                                                                | Not reported                                                                                            | NR                         | NR                                          | CCI                         | Death           | Yes              |
| 2009 | 2004-2007 <sup>e9</sup>  | US      | Retrospective hospital-based study with two centres | IS/TIA/ ICH    | NR                                                                                 | -                                                                                                 | -                                                                                                       | NR                         | NIHSS                                       | NR                          | Death and mRS   | No               |
| 2009 | 2003-2007 <sup>e10</sup> | US      | Prospective registry                                | IS/ICH/ SAH    | 430, 431, 433, 434, 436                                                            | Did not specify 433/434; 436 included seizure ; 432.9/unspecified intracranial bleed not included | -                                                                                                       | NR                         | NR                                          | RF                          | Death           | Yes              |
| 2009 | 2004 <sup>e11</sup>      | US      | Administrative database                             | ICH            | 431                                                                                | 432.9/unspecified intracranial bleed not included                                                 | Not reported                                                                                            | NR                         | NR                                          | RF                          | Death           | Yes              |
| 2009 | 2004 <sup>e12</sup>      | US      | Administrative database                             | SAH            | 430                                                                                | No                                                                                                | Not reported                                                                                            | NR                         | NR                                          | RF                          | Death           | No               |
| 2010 | 2002-2007 <sup>e13</sup> | US      | Administrative database                             | IS             | 433.01, 433.11, 433.21, 433.31, 433.81, 433.91, 434.01, 434.11, 434.91, 437.1      | 437.1/acute cerebrovascular insufficiency or chronic cerebral ischemia                            | Only admissions through ED included                                                                     | NR                         | NR                                          | RF                          | Death           | No               |
| 2010 | 1998-2006 <sup>e14</sup> | US      | Administrative database                             | IS             | 433.01, 433.11, 433.21, 433.31, 433.81, 433.91, 434.01, 434.11, 434.91             | No                                                                                                | Not reported                                                                                            | NR                         | NR                                          | NR                          | Death           | No               |
| 2010 | 2003-2008 <sup>e15</sup> | Canada  | Prospective registry                                | Stroke         | NR                                                                                 | -                                                                                                 | -                                                                                                       | Only first stroke          | CNS                                         | CCI                         | Death           | Yes              |
| 2010 | 1988-2003 <sup>e16</sup> | Japan   | Prospective registry                                | SAH            | NR                                                                                 | -                                                                                                 | -                                                                                                       | Only first-ever SAH        | JCS                                         | RF                          | Death           | No               |
| 2011 | 2008-2009 <sup>e17</sup> | China   | Retrospective single centre                         | ICH            | NR                                                                                 | -                                                                                                 | -                                                                                                       | NR                         | ICS                                         | NR                          | Death and mRS   | No               |
| 2011 | 2006-2009 <sup>e18</sup> | China   | Retrospective single centre                         | SAH            | NR                                                                                 | -                                                                                                 | -                                                                                                       | NR                         | NR                                          | CCI                         | Death           | No               |
| 2011 | 2000-2004 <sup>e19</sup> | Holland | Administrative database                             | IS             | 433, 434, 436                                                                      | Did not specify 433/434; 436 included seizure                                                     | Included also non-emergency cases but adjusted for admission method                                     | NR                         | NR                                          | CCI                         | Death           | Yes              |
| 2011 | 1987-2004 <sup>e20</sup> | US      | Prospective cohort                                  | Stroke         | NR (physician-validated)                                                           | -                                                                                                 | -                                                                                                       | NR                         | Symptoms used as a proxy                    | CCI                         | Death           | No               |
| Year | Study period             | Country | Data source                                         | Stroke subtype | ICD codes used                                                                     | Potentially inaccurate codes                                                                      | If admission method available                                                                           | Double-counting            | Severity included                           | Comorbidity included        | Outcome measure | ‘Weekend effect’ |

|      |                          |                 |                             |                           |                                                                        |                                                                          |  |                                                                                         |                                                                                            |                                 |                              |               |     |
|------|--------------------------|-----------------|-----------------------------|---------------------------|------------------------------------------------------------------------|--------------------------------------------------------------------------|--|-----------------------------------------------------------------------------------------|--------------------------------------------------------------------------------------------|---------------------------------|------------------------------|---------------|-----|
| 2011 | 1996-2007 <sup>e21</sup> | US              | Administrative database     | IS                        | 433.01, 433.11, 433.21, 433.31, 433.81, 433.91, 434.01, 434.11, 434.91 | No                                                                       |  | Not reported                                                                            | Only the first discharge record                                                            | NR                              | RF                           | Death         | Yes |
| 2012 | 2004-2005 <sup>e22</sup> | Korea           | Prospective registry        | IS                        | NR                                                                     | -                                                                        |  | -                                                                                       | NR                                                                                         | NIHSS                           | RF and premorbid mRS         | Death and mRS | No  |
| 2012 | 2004-2005 <sup>e23</sup> | Poland          | Prospective registry        | IS                        | NR                                                                     | -                                                                        |  | -                                                                                       | NR                                                                                         | Consciousness/<br>cardioembolic | RF and premorbid mRS         | mRS           | Yes |
| 2012 | 2008-2009 <sup>e24</sup> | Spain           | Prospective single centre   | ICH/IS                    | NR                                                                     | -                                                                        |  | -                                                                                       | NR                                                                                         | NIHSS                           | RF                           | mRS           | No  |
| 2012 | 2009-2010 <sup>e25</sup> | UK              | Administrative database     | Acute CVD                 | G436, I60, I61, I62, I63, I66                                          | I62 included SDH/EDH, I66/occlusion without infarct, I64 not included    |  | Stratified by emergency vs. elective admissions but not reported for stroke             | NR                                                                                         | NR                              | CCI, admission route         | Death         | Yes |
| 2012 | 2009-2010 <sup>e26</sup> | UK              | Administrative database     | Stroke                    | I60-I64                                                                | I62 included SDH/EDH                                                     |  | Admission method known but not used in analyses                                         | NR                                                                                         | NR                              | CCI                          | Death         | Yes |
| 2012 | 2002-2009 <sup>e27</sup> | US              | Prospective registry        | IS                        | NR                                                                     | -                                                                        |  | -                                                                                       | NR                                                                                         | NIHSS                           | NR                           | Death and mRS | No  |
| 2013 | 2006-2008 <sup>e28</sup> | Brazil          | Prospective single centre   | IS/ICH                    | NR                                                                     | -                                                                        |  | -                                                                                       | Only first-time stroke                                                                     | NR                              | RF                           | Death         | No  |
| 2013 | 1985-2010 <sup>e29</sup> | France          | Population-based cohort     | Stroke/<br>TIA            | NR (multiple sources)                                                  | -                                                                        |  | -                                                                                       | Only first-in-study events                                                                 | NIHSS                           | RF                           | Death         | No  |
| 2014 | 2000-2007 <sup>e30</sup> | Australia       | Administrative database     | Stroke                    | ICD 10/DRG B70                                                         | Included TGA, SDH and occlusion of artery without infarct, and other CVD |  | Only included admissions through ED                                                     | When patient readmitted within 1 week of discharge, only the last episode of care is taken | NR                              | CCI                          | Death         | Yes |
| 2014 | 2011-2012 <sup>e31</sup> | England         | Prospective registry        | IS/ICH                    | NR                                                                     | -                                                                        |  | -                                                                                       | NR                                                                                         | Consciousness                   | Premorbid functional status  | Death         | No  |
| 2014 | 2010-2011 <sup>e32</sup> | Japan           | Administrative database     | Stroke                    | I60.0-I60.9, I61.0-I61.9, I62.0, I62.1, I62.9, I63.0-I63.9             | SDH/EDH included; I64 not included                                       |  | Not reported                                                                            | NR                                                                                         | JCS                             | RF                           | mRS           | No  |
| 2014 | 2009-2013 <sup>e33</sup> | US              | Retrospective single centre | ICH                       | NR                                                                     | -                                                                        |  | -                                                                                       | NR                                                                                         | Yes/no details                  | NR                           | mRS           | No  |
| 2015 | 2010 <sup>e34</sup>      | Denmark         | Administrative database     | Stroke                    | I60, I61, I63, I64                                                     | I62.9 unspecified intracranial haemorrhage not included                  |  | Subgroup analyses including only admissions from ED for all but not reported for stroke | Only first acute admission                                                                 | NR                              | CCI                          | Death         | Yes |
| 2015 | - <sup>e35</sup>         | Spain           | Retrospective single centre | Stroke                    | NR                                                                     | -                                                                        |  | -                                                                                       | NR                                                                                         | NIHSS                           | NR                           | mRS           | No  |
| 2015 | 2004-2011 <sup>e36</sup> | UK              | Administrative database     | IS/ICH/<br>unknown stroke | I61-I64                                                                | I62 included SDH/EDH                                                     |  | Not reported                                                                            | Only the first admission                                                                   | NR                              | RF                           | Death         | Yes |
| 2015 | 2013-2014 <sup>e37</sup> | UK              | Administrative database     | Cardiovascular disease    | ICD 10 but no detailed codes reported                                  | -                                                                        |  | Adjusted for admission urgency                                                          | NR                                                                                         | NR                              | CCI/predicted mortality risk | Death         | Yes |
| 2015 | 2004-2012 <sup>e38</sup> | England & Wales | Administrative database     | Stroke/<br>SAH            | I60, I61-64                                                            | I62 included SDH/EDH                                                     |  | Not mentioned how emergency admissions were defined                                     | NR                                                                                         | NR                              | NR                           | Death         | Yes |
| 2015 | 2010-2011 <sup>e39</sup> | Japan           | Administrative database     | IS                        | I63                                                                    | I64 not included                                                         |  | Not reported                                                                            | NR                                                                                         | NR                              | RF and premorbid mRS         | Death and mRS | No  |
| 2015 | 2002-2012 <sup>e40</sup> | Japan           | Prospective single centre   | IS                        | NR                                                                     | -                                                                        |  | -                                                                                       | NR                                                                                         | NIHSS                           | RF and premorbid mRS         | mRS           | No  |
| 2016 | 2005-2013 <sup>e41</sup> | Scotland        | Administrative database     | IS/ICH                    | NR                                                                     | -                                                                        |  | Not reported                                                                            | NR                                                                                         | NR                              | RF                           | Death         | Yes |
| 2016 | 2002-2013 <sup>e42</sup> | Korea           | Administrative database     | IS                        | I63, G45                                                               | TIA included; I64 not included                                           |  | Not reported                                                                            | NR                                                                                         | NR                              | CCI                          | Death         | Yes |

IS=ischemic stroke, ICH=intracerebral haemorrhage, SAH=subarachnoid haemorrhage, EDH=extradural haemorrhage, SDH=subdural haemorrhage, TIA=transient ischaemic attack, TGA=transient global amnesia, CVD=cerebrovascular disease, ED=Emergency Department, NIHSS=The National Institutes of Health Stroke Scale, JCS=Japan Coma Scale, CNS=Canadian Neurological Scale, ICS=Intracerebral haemorrhage Score, CCI=Charlson Comorbidity Index, RF=risk factors, mRS=modified Rankin Scale, NR=not reported.

- e1. Bell CM, Redelmeier DA. Mortality among patients admitted to hospitals on weekends as compared with weekdays. *N Engl J Med* 2001; 345: 663-8.
- e2. Cram P, Hillis SL, Barnett M, Rosenthal GE. Effects of weekend admission and hospital teaching status on in-hospital mortality. *Am J Med* 2004; 117: 151-7.
- e3. Hasegawa Y, Yoneda Y, Okuda S, et al. The effect of weekends and holidays on stroke outcome in acute stroke units. *Cerebrovasc Dis* 2005; 20: 325-31.
- e4. Saposnik G, Baibergenova A, Bayer N, Hachinski V. Weekends: a dangerous time for having a stroke? *Stroke* 2007; 38: 1211-5.
- e5. Janszky I, Ahnve S, Ljung R. Weekend versus weekday admission and stroke outcome in Sweden from 1968 to 2005. *Stroke* 2007; 38: e94.
- e6. Turin TC, Kita Y, Rumana N, et al. Case fatality of stroke and day of the week: is the weekend effect an artifact? Takashima stroke registry, Japan (1988-2003). *Cerebrovasc Dis* 2008; 26: 606-11.
- e7. Jauss M, Oertel W, Allendoerfer J, Misselwitz B, Hamer H. Bias in request for medical care and impact on outcome during office and non-office hours in stroke patients. *Eur J Neurol* 2009; 16: 1165-7.
- e8. Tung YC, Chang GM, Chen YH. Associations of physician volume and weekend admissions with ischemic stroke outcome in Taiwan: a nationwide population-based study. *Med Care* 2009; 47: 1018-25.
- e9. Albright KC, Raman R, Ernstrom K, et al. Can comprehensive stroke centers erase the 'weekend effect'? *Cerebrovasc Dis* 2009; 27: 107-13.
- e10. Reeves MJ, Smith E, Fonarow G, et al. Off-hour admission and in-hospital stroke case fatality in the get with the guidelines-stroke program. *Stroke* 2009; 40: 569-76.
- e11. Crowley RW, Yeoh HK, Stukenborg GJ, Medel R, Kassell NF, Dumont AS. Influence of weekend hospital admission on short-term mortality after intracerebral hemorrhage. *Stroke* 2009; 40: 2387-92.
- e12. Crowley RW, Yeoh HK, Stukenborg GJ, Ionescu AA, Kassell NF, Dumont AS. Influence of weekend versus weekday hospital admission on mortality following subarachnoid hemorrhage. Clinical article. *J Neurosurg* 2009; 111: 60-6.
- e13. Hoh BL, Chi YY, Waters MF, Mocco J, Barker FG, 2nd. Effect of weekend compared with weekday stroke admission on thrombolytic use, in-hospital mortality, discharge disposition, hospital charges, and length of stay in the Nationwide Inpatient Sample Database, 2002 to 2007. *Stroke* 2010; 41: 2323-8.
- e14. Kazley AS, Hillman DG, Johnston KC, Simpson KN. Hospital care for patients experiencing weekend vs weekday stroke: a comparison of quality and aggressiveness of care. *Arch Neurol* 2010; 67: 39-44.
- e15. Fang JM, Saposnik G, Silver FL, Kapral MK, Network RCS. Association between weekend hospital presentation and stroke fatality. *Neurology* 2010; 75: 1589-96.
- e16. Turin TC, Kita Y, Rumana N, et al. Circaseptan variation in case-fatality rate for patients with acute subarachnoid hemorrhage (Takashima Stroke Registry 1988-2003). *J Clin Neurosci* 2010; 17: 869-73.
- e17. Jiang F, Zhang JH, Qin X. "Weekend effects" in patients with intracerebral hemorrhage. *Acta Neurochir Suppl* 2011; 111: 333-6.
- e18. Zhang G, Zhang JH, Qin X. Effect of weekend admission on in-hospital mortality after subarachnoid hemorrhage in Chongqing China. *Acta Neurochir Suppl* 2011; 110: 229-32.
- e19. Ogbu UC, Westert GP, Slobbe LC, Stronks K, Arah OA. A multifaceted look at time of admission and its impact on case-fatality among a cohort of ischaemic stroke patients. *J Neurol Neurosurg Psychiatry* 2011; 82: 8-13.
- e20. O'Brien EC, Rose KM, Shahar E, Rosamond WD. Stroke Mortality, Clinical Presentation and Day of Arrival: The Atherosclerosis Risk in Communities (ARIC) Study. *Stroke Res Treat* 2011; 2011: 383012.doi: 10.4061/2011/383012.

- e21. McKinney JS, Deng Y, Kasner SE, Kostis JB, Myocardial Infarction Data Acquisition System Study G. Comprehensive stroke centers overcome the weekend versus weekday gap in stroke treatment and mortality. *Stroke* 2011; 42: 2403-9.
- e22. Kim SC, Hong KS, Hwang SI, et al. Weekend admission in patients with acute ischemic stroke is not associated with poor functional outcome than weekday admission. *J Clin Neurol* 2012; 8: 265-70.
- e23. Niewada M, Jezierska-Ostapczuk A, Skowronska M, Sarzynska-Dlugosz I, Czlonkowska A. Weekend versus weekday admissions in Polish stroke centres -- could admission day affect prognosis in Polish ischaemic stroke patients? *Neurologia i neurochirurgia polska* 2012; 46: 15-21.
- e24. Martinez-Martinez MM, Fernandez-Travieso J, Fuentes B, et al. Off-hour effects on stroke care and outcome in stroke centres. *Eur J Neurol* 2012; 19: 1140-5.
- e25. Freemantle N, Richardson M, Wood J, et al. Weekend hospitalization and additional risk of death: an analysis of inpatient data. *Journal of the Royal Society of Medicine* 2012; 105: 74-84.
- e26. Palmer WL, Bottle A, Davie C, Vincent CA, Aylin P. Dying for the weekend: a retrospective cohort study on the association between day of hospital presentation and the quality and safety of stroke care. *Arch Neurol* 2012; 69: 1296-302.
- e27. Albright KC, Savitz SI, Raman R, et al. Comprehensive stroke centers and the 'weekend effect': the SPOTRIAS experience. *Cerebrovasc Dis* 2012; 34: 424-9.
- e28. Barros JB, Goulart AC, Alencar AP, Lotufo PA, Bensenor IM. The influence of the day of the week of hospital admission on the prognosis of stroke patients. *Cadernos de saude publica* 2013; 29: 769-77.
- e29. Bejot Y, Aboa-Eboule C, Jacquin A, et al. Stroke care organization overcomes the deleterious 'weekend effect' on 1-month stroke mortality: a population-based study. *Eur J Neurol* 2013; 20: 1177-83.
- e30. Concha OP, Gallego B, Hillman K, Delaney GP, Coiera E. Do variations in hospital mortality patterns after weekend admission reflect reduced quality of care or different patient cohorts? A population-based study. *BMJ Qual Saf* 2014; 23: 215-22.
- e31. Bray BD, Ayis S, Campbell J, et al. Associations between stroke mortality and weekend working by stroke specialist physicians and registered nurses: prospective multicentre cohort study. *PLoS Med* 2014; 11: e1001705. doi: 10.1371/journal.pmed.1001705.
- e32. Kamitani S, Nishimura K, Nakamura F, et al. Consciousness level and off-hour admission affect discharge outcome of acute stroke patients: a J-ASPECT study. *J Am Heart Assoc* 2014; 3: e001059. doi: 10.1161/JAHA.114.001059.
- e33. McDowell MM, Kellner CP, Sussman ES, et al. The role of admission timing in the outcome of intracerebral hemorrhage patients at a specialized stroke center. *Neurol Res* 2014; 36: 95-101.
- e34. Vest-Hansen B, Riis AH, Sorensen HT, Christiansen CF. Out-of-hours and weekend admissions to Danish medical departments: admission rates and 30-day mortality for 20 common medical conditions. *BMJ open* 2015; 5: e006731. doi: 10.1136/bmjopen-2014/006731
- e35. Romero Sevilla R, Portilla Cuenca JC, Lopez Espuela F, et al. A stroke care management system prevents outcome differences related to time of stroke unit admission. *Neurologia* 2015. doi: 10.1016/j.nrl.2015.07.011.
- e36. Roberts SE, Thorne K, Akbari A, Samuel DG, Williams JG. Mortality following Stroke, the Weekend Effect and Related Factors: Record Linkage Study. *PLoS One* 2015; 10: e0131836. doi: 10.1371/journal.pone.0131836
- e37. Freemantle N, Ray D, McNulty D, et al. Increased mortality associated with weekend hospital admission: a case for expanded seven day services? *BMJ* 2015; 351: h4596. doi: 10.1136/bmj.h4596
- e38. Roberts SE, Thorne K, Akbari A, Samuel DG, Williams JG. Weekend emergency admissions and mortality in England and Wales. *Lancet* 2015; 385: 1829.

e39. Inoue T, Fushimi K. Weekend versus Weekday Admission and In-Hospital Mortality from Ischemic Stroke in Japan. *J Stroke Cerebrovasc Dis* 2015; 24: 2787-92.

e40. Nakajima M, Inatomi Y, Yonehara T, Watanabe M, Ando Y. Outcome in patients admitted outside regular hospital working hours: does time until regular working hours matter? *Int J Stroke* 2015; 10: 79-84.

e41. Turner M, Barber M, Dodds H, Dennis M, Langhorne P, Macleod MJ. Stroke patients admitted within normal working hours are more likely to achieve process standards and to have better outcomes. *J Neurol Neurosurg Psychiatry* 2016; 87: 138-43.

e42. Cho KH, Park EC, Nam CM, Choi Y, Shin J, Lee SG. Effect of Weekend Admission on In-Hospital Mortality in Patients with Ischemic Stroke: An Analysis of Korean Nationwide Claims Data from 2002 to 2013. *J Stroke Cerebrovasc Dis* 2016; 25: 419-27.
